# Supplementary material
Source: PubMed Central journal article supplement (PMC7952119)
Supplement: ee9-3-e033-s001.pdf [file ee9-3-e033-s001.pdf]

Supplementary table. Results of AIC and BIC analysis for 6 competing models

| Model                                     | -2logL       | AIC          | BIC          |
|-------------------------------------------|--------------|--------------|--------------|
| M <sub>1</sub> : adjusted for session     | -78.8        | -64.8        | -67.5        |
| M <sub>2</sub> : adjusted for gender      | -78.3        | -68.3        | -70.2        |
| M <sub>3</sub> : adjusted for age         | -78.6        | -68.6        | -70.6        |
| M <sub>4</sub> : Base model (unadjusted)  | -78.3        | -70.3        | -71.9        |
| M <sub>5</sub> : adjusted for age and BMI | <b>-82.9</b> | <b>-70.9</b> | <b>-73.3</b> |
| M <sub>6</sub> : adjusted for BMI         | <b>-82.9</b> | <b>-72.9</b> | <b>-74.9</b> |

*Note.* Result in bold indicate the better fitting model
