# Supplementary material
Source: PubMed Central journal article supplement (PMC7952119)
Supplement: ee9-3-e033-s002.pdf [file ee9-3-e033-s002.pdf]

Supplementary table 2. Characteristics of the study subjects (n = 5)

| Subject | Age | Gender | Visit | BMI   | Nicotine | ASDNN | SDNN  | RMSSD | QTc | Exposure Time (min) |
|---------|-----|--------|-------|-------|----------|-------|-------|-------|-----|---------------------|
| 1       | 41  | M      | 1     | 23.36 | 7.08     | 68.1  | 67.2  | 26.6  | 421 | <15                 |
| 1       | 41  | M      | 1     | 23.36 | 7.08     | 48.9  | 47.1  | 26.6  | 413 | 15-30               |
| 1       | 41  | M      | 1     | 23.36 | 7.08     | 60.6  | 80.2  | 58.9  | 418 | 30-45               |
| 1       | 41  | M      | 1     | 23.36 | 7.08     | 56    | 59.4  | 52    | 413 | 45-60               |
| 1       | 41  | M      | 2     | 23.36 | 5.39     | 42.4  | 42.4  | 21.1  | 432 | <15                 |
| 1       | 41  | M      | 2     | 23.36 | 5.39     | 47.6  | 52.9  | 24.1  | 432 | 15-30               |
| 1       | 41  | M      | 2     | 23.36 | 5.39     | 52.4  | 53.8  | 24.2  | 431 | 30-45               |
| 1       | 41  | M      | 2     | 23.36 | 5.39     | 50.6  | 52.8  | 22    | 433 | 45-60               |
| 2       | 26  | F      | 1     | 21.64 | 8.51     | 62.7  | 64.7  | 68.1  | 415 | <15                 |
| 2       | 26  | F      | 1     | 21.64 | 8.51     | 50.2  | 55.8  | 50.6  | 419 | 15-30               |
| 2       | 26  | F      | 1     | 21.64 | 8.51     | 47.1  | 47.8  | 34.2  | 434 | 30-45               |
| 2       | 26  | F      | 1     | 21.64 | 8.51     | 34.1  | 39.4  | 27.2  | 446 | 45-60               |
| 2       | 26  | F      | 2     | 21.64 | 4.99     | 74.8  | 78.4  | 57.8  | 445 | <15                 |
| 2       | 26  | F      | 2     | 21.64 | 4.99     | 65.2  | 63.3  | 61.2  | 429 | 15-30               |
| 2       | 26  | F      | 2     | 21.64 | 4.99     | 49.9  | 48.2  | 46.2  | 443 | 30-45               |
| 2       | 26  | F      | 2     | 21.64 | 4.99     | 49.3  | 46.9  | 36.6  | 443 | 45-60               |
| 3       | 28  | M      | 1     | 20.20 | 5.69     | 77.1  | 81.8  | 42.3  | 404 | <15                 |
| 3       | 28  | M      | 1     | 20.20 | 5.69     | 83    | 84.7  | 59.5  | 398 | 15-30               |
| 3       | 28  | M      | 1     | 20.20 | 5.69     | 82.2  | 79.2  | 34.3  | 404 | 30-45               |
| 3       | 28  | M      | 1     | 20.20 | 5.69     | 73.1  | 82.8  | 33.4  | 401 | 45-60               |
| 3       | 28  | M      | 2     | 20.20 | 7.06     | 78.3  | 81.2  | 42.7  | 399 | <15                 |
| 3       | 28  | M      | 2     | 20.20 | 7.06     | 82.8  | 83.5  | 40.2  | 398 | 15-30               |
| 3       | 28  | M      | 2     | 20.20 | 7.06     | 65.1  | 65.1  | 31.8  | 396 | 30-45               |
| 3       | 28  | M      | 2     | 20.20 | 7.06     | 67.7  | 64.8  | 26.1  | 400 | 45-60               |
| 4       | 27  | F      | 1     | 22.94 | 2.33     | 68.2  | 66    | 46.9  | 423 | <15                 |
| 4       | 27  | F      | 1     | 22.94 | 2.33     | 53.8  | 58.8  | 34.1  | 430 | 15-30               |
| 4       | 27  | F      | 1     | 22.94 | 2.33     | 59.3  | 65.9  | 36.9  | 437 | 30-45               |
| 4       | 27  | F      | 1     | 22.94 | 2.33     | 83.6  | 86.9  | 50.3  | 429 | 45-60               |
| 4       | 27  | F      | 2     | 22.94 | 1.36     | 81.1  | 79.3  | 56    | 433 | <15                 |
| 4       | 27  | F      | 2     | 22.94 | 1.36     | 101   | 113.9 | 70.3  | 435 | 15-30               |
| 4       | 27  | F      | 2     | 22.94 | 1.36     | 127.4 | 128.8 | 83.5  | 430 | 30-45               |
| 4       | 27  | F      | 2     | 22.94 | 1.36     | 91    | 110   | 52.4  | 438 | 45-60               |
| 5       | 25  | M      | 1     | 25.80 | 2.86     | 66.8  | 64.5  | 31.7  | 426 | <15                 |
| 5       | 25  | M      | 1     | 25.80 | 2.86     | 62.8  | 70.7  | 34.8  | 437 | 15-30               |
| 5       | 25  | M      | 1     | 25.80 | 2.86     | 61.7  | 67.5  | 34.2  | 436 | 30-45               |
| 5       | 25  | M      | 1     | 25.80 | 2.86     | 64.3  | 63.9  | 34    | 434 | 45-60               |
| 5       | 25  | M      | 2     | 25.80 | 3.06     | 65.9  | 67.9  | 32.8  | 433 | <15                 |
| 5       | 25  | M      | 2     | 25.80 | 3.06     | 58.1  | 62.6  | 30.4  | 432 | 15-30               |
| 5       | 25  | M      | 2     | 25.80 | 3.06     | 57    | 60.5  | 30.1  | 435 | 30-45               |
| 5       | 25  | M      | 2     | 25.80 | 3.06     | 63.6  | 64    | 29.3  | 438 | 45-60               |
